# Supplementary material for: Solid phase extraction-based magnetic carbon nitride/metal organic framework composite with high performance liquid chromatography for the determination of tyrosine kinase inhibitors in urine samples
Source: Royal Society of Chemistry journal article supplement (doi:10.1039/d0ay01243b), 2020-01-01
Supplement: d0ay01243b1.pdf [file d0ay01243b1.pdf]

## Electronic Supplementary Information

### **Solid phase extraction based on magnetic carbon nitride/metal organic framework composite with high performance liquid chromatography for determination of tyrosine kinase inhibitors in urine samples**

Donghao Liu<sup>a,c</sup>, Jun Peng<sup>b</sup>, Li Chen<sup>a</sup>, Yan Zhang<sup>a</sup>, Xiaoyang Han<sup>a</sup>, Ping Yang<sup>a</sup>, Hua He<sup>a,c,d,\*</sup>

a Department of Analytical Chemistry, China Pharmaceutical University, Nanjing 211198, China

b The Key Laboratory for Medical Tissue Engineering, College of Medical Engineering, Jining Medical University, Jining, 272067, China

c Key Laboratory of Biomedical Functional Materials, China Pharmaceutical University, Nanjing 211198, China

d Key Laboratory of Drug Quality Control and Pharmacovigilance, Ministry of Education, China Pharmaceutical University, Nanjing 211198, China

\* Correspondence to: Department of Analytical Chemistry, China Pharmaceutical University, 639 Longmian Avenue, Nanjing 211198, Jiangsu Province, China.

E-mail addresses: [jcb\\_321@163.com](mailto:jcb_321@163.com), [dochehua@163.com](mailto:dochehua@163.com)

## **S1 Material performance studies of MCN/BIF-20**

### **The effect of solution pH**

Britton-Robinson buffer (BR Buffer) was prepared by following process: 0.245 mL  $\text{H}_3\text{PO}_4$ , 0.230 mL HAC and 0.247 g  $\text{H}_3\text{BO}_3$  was added into 100 mL volumetric flask, then distilled water was added to the tick mark. By adding different volumes of NaOH solution ( $0.2 \text{ mol L}^{-1}$ ) to the mixture, different pH BR buffer were acquired. 2mg MCN/BIF-20 was added to each 2 mL solution of imatinib, gefitinib or erlotinib ( $100 \mu\text{g mL}^{-1}$ ) and 0.2 mL BR buffer with different pH (2, 4, 6, 7, 8, 10, 12). The solution was shaken at room temperature for 120 min with gas bath oscillator. After magnetically separated, the supernatant was filtered through 0.22  $\mu\text{m}$  membrane and tested by HPLC-DAD to detect drugs.

### **The adsorption kinetics**

To evaluate the rate of adsorption of MCN/BIF-20, 2 mg MCN/BIF-20 was mixed with 2 mL of TKIs drugs solution at a concentration of  $100 \mu\text{g mL}^{-1}$  and 0.2 mL BR buffer (pH=4). After shaking with different time (5min, 10 min, 15min, 20 min, 30 min, 40 min, 50 min, 60 min), the drugs in the supernatant were separated by a magnet and then detected by HPLC-DAD.

### **The adsorption isotherm**

To evaluate the adsorption capacity of MCN/BIF-20, 2 mg MCN/BIF-20 was added to the 2 mL TKIs drugs solution (pH=4) in different initial concentration ( $100 \mu\text{g mL}^{-1}$ ,  $200 \mu\text{g mL}^{-1}$ ,  $300 \mu\text{g mL}^{-1}$ ,  $400 \mu\text{g mL}^{-1}$ ,  $500 \mu\text{g mL}^{-1}$ ,  $600 \mu\text{g mL}^{-1}$ ,  $700 \mu\text{g mL}^{-1}$ ,  $800 \mu\text{g mL}^{-1}$ ) and 0.2 mL BR buffer (pH=4). According to the results of adsorption kinetics experiment, 40 min was selected to adsorption time. After shaking with 40 min, the drugs in the supernatant were separated by a magnet and then detected by HPLC-DAD.

### **Comparison of single materials**

To evaluate the adsorption properties of complex material and single materials including g- $\text{C}_3\text{N}_4$ , MCN, BIF-20, gefitinib was chosen to model drug. And the

experiment process of pH, adsorption kinetics and adsorption isotherm of single materials was obtained by experiment as well as MCN/BIF-20.

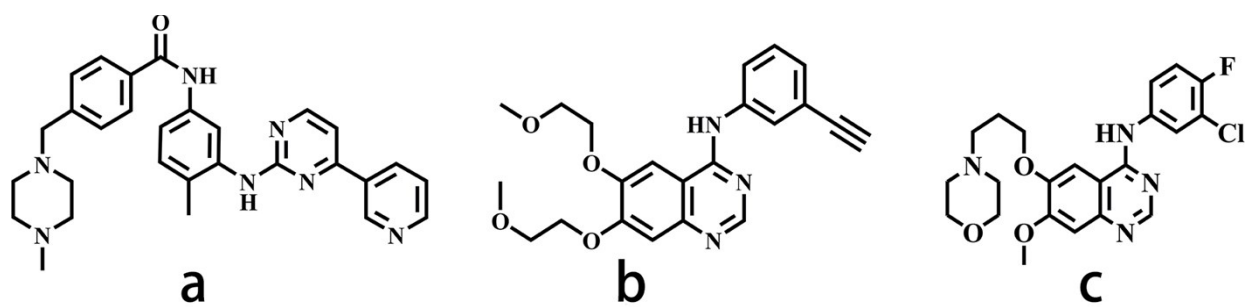

**Fig.S1** The molecular structures of imatinib(**a**), erlotinib(**b**) and gefitinib(**c**)

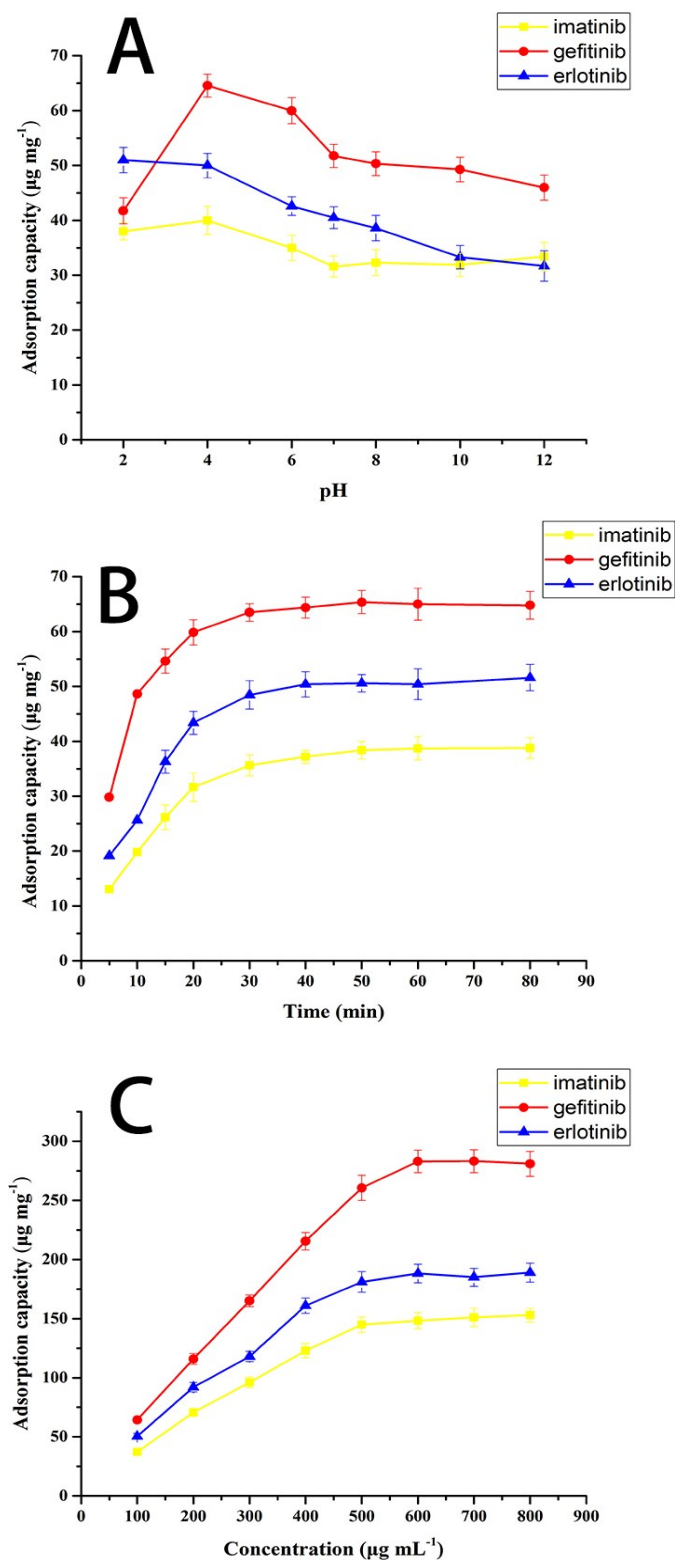

**Fig. S2.** Material science performance studies of MCN/BIF-20. The effect of pH (A) , adsorption kinetics curves of TKIs (B) and adsorption isotherm curves of TKIs (C).

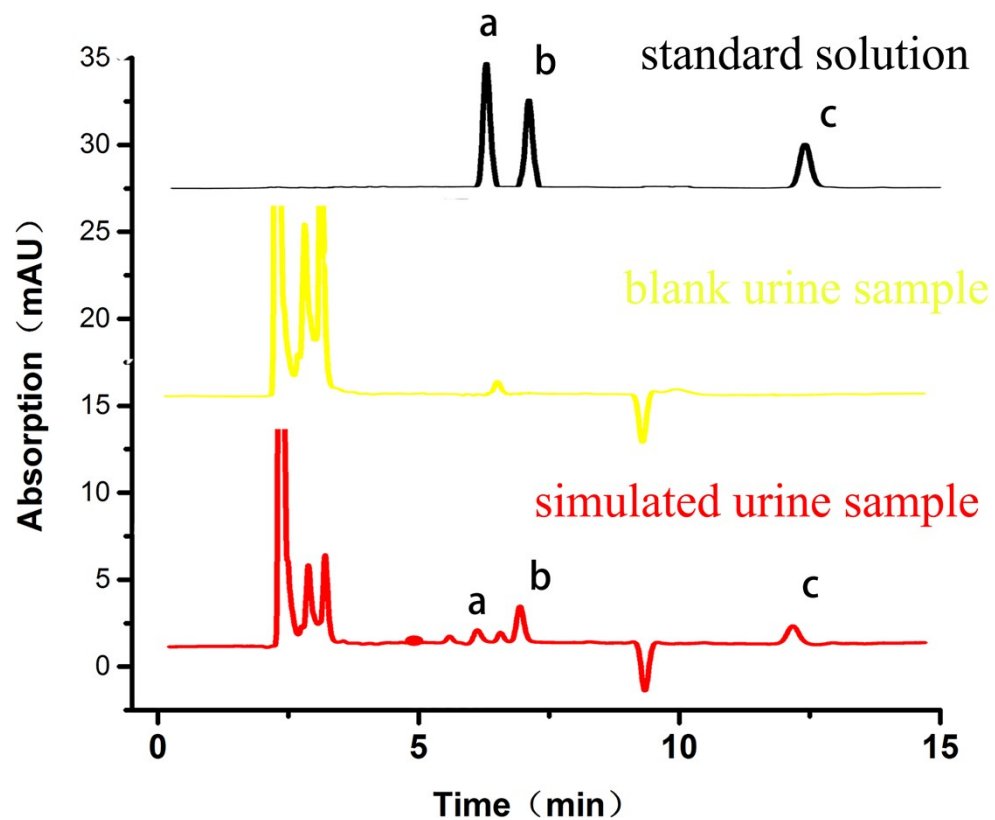

**Fig.S3** the HPLC chromatogram of imatinib(**a**), erlotinib(**b**) and gefitinib(**c**) in the standard solution, blank urine sample and simulated urine sample.

**Table S1** Constants of adsorption kinetic models for adsorption of TKIs on MCN/BIF-20.

|           | $Q_{e,exp}$<br>(mg g <sup>-1</sup> ) | Pseudo-first-order kinetic model     |                               |        | Pseudo-second-order kinetic model    |                                                  |        |
|-----------|--------------------------------------|--------------------------------------|-------------------------------|--------|--------------------------------------|--------------------------------------------------|--------|
|           |                                      | $Q_{e,cal}$<br>(mg g <sup>-1</sup> ) | $K_1$<br>(min <sup>-1</sup> ) | $R^2$  | $Q_{e,cal}$<br>(mg g <sup>-1</sup> ) | $K_2$<br>(g mg <sup>-1</sup> min <sup>-1</sup> ) | $R^2$  |
| imatinib  | 37.20                                | 42.89                                | 0.0898                        | 0.9966 | 52.36                                | 0.0013                                           | 0.9904 |
| gefitinib | 64.37                                | 62.71                                | 0.1244                        | 0.9971 | 80.65                                | 0.0017                                           | 0.9929 |
| erlotinib | 50.40                                | 56.93                                | 0.0904                        | 0.9936 | 69.93                                | 0.0010                                           | 0.9808 |

**Table S2** Constants of adsorption isotherm model parameters for adsorption of TKIs on MCN/BIF-20.

|           | $Q_{e,exp}$<br>(mg g <sup>-1</sup> ) | Freundlich model |                                |                | Langmuir model                       |                                |                |
|-----------|--------------------------------------|------------------|--------------------------------|----------------|--------------------------------------|--------------------------------|----------------|
|           |                                      | 1/n              | $K_f$<br>(mg g <sup>-1</sup> ) | R <sup>2</sup> | $Q_{e,cal}$<br>(mg g <sup>-1</sup> ) | $K_l$<br>(g mg <sup>-1</sup> ) | R <sup>2</sup> |
| imatinib  | 148.33                               | 0.783            | 1.4952                         | 0.9969         | 384.62                               | 0.0017                         | 0.9866         |
| gefitinib | 283.25                               | 0.710            | 5.1725                         | 0.9941         | 555.56                               | 0.0034                         | 0.9567         |
| erlotinib | 188.17                               | 0.691            | 3.4586                         | 0.9898         | 357.14                               | 0.0032                         | 0.9249         |

**Table S3** The experimental results of adsorption studies of gefitinib on g-C<sub>3</sub>N<sub>4</sub>, MCN, BIF-20 and MCN/BIF-20.

| Materials                       | pH | Adsorption<br>equilibrium time<br>(min) | Adsorption<br>capacity (mg g <sup>-1</sup> ) |
|---------------------------------|----|-----------------------------------------|----------------------------------------------|
| g-C <sub>3</sub> N <sub>4</sub> | 4  | 40                                      | 50.63                                        |
| MCN                             | 4  | 40                                      | 55.29                                        |
| BIF-20                          | 4  | 50                                      | 179.46                                       |
| MCN/BIF-20                      | 4  | 40                                      | 283.25                                       |
